# Supplementary material
Source: ML conference proceedings conference paper supplement (https://openreview.net/forum?id=ScIEZdIiqe5)

thunder snake

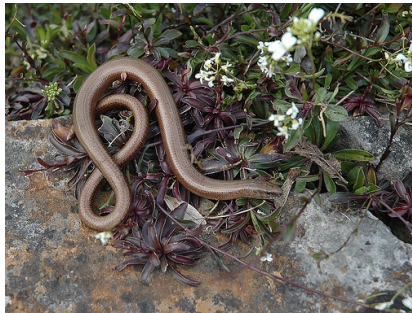

ringneck snake

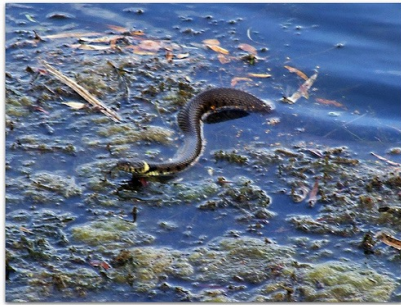

hognose snake

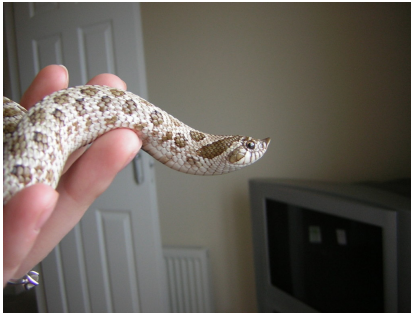

green snake

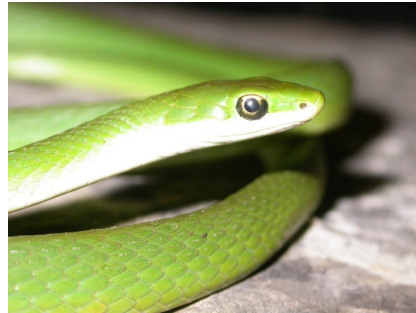

king snake

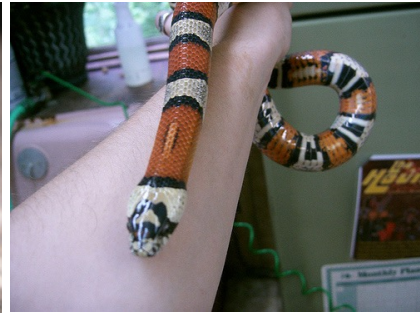

garter snake

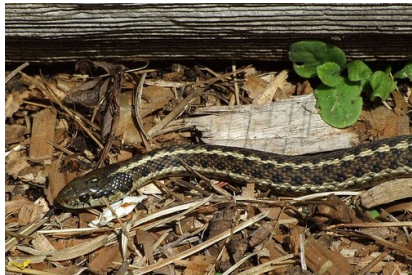

water snake

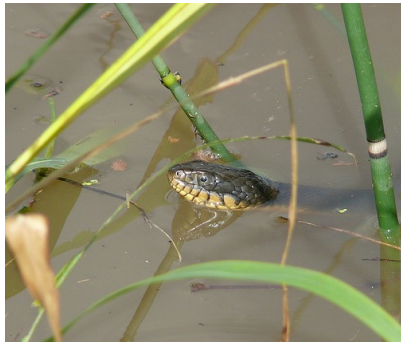

vine snake

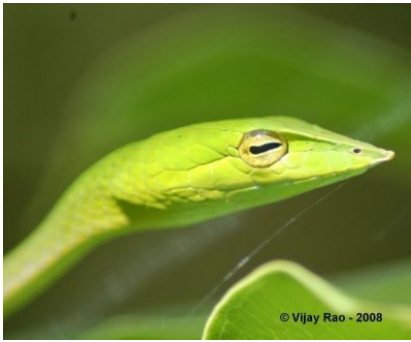

night snake

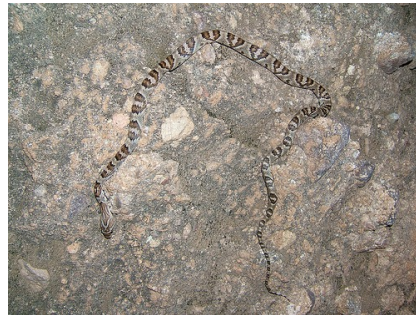

boa constrictor

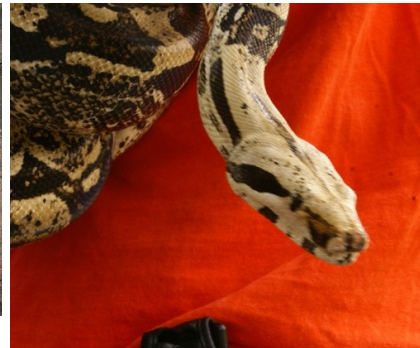

Supplement: supplementary_material [file attachment]
