# Supplementary material
Source: ML conference proceedings conference paper supplement (https://openreview.net/forum?id=ScIEZdIiqe5)

# Train

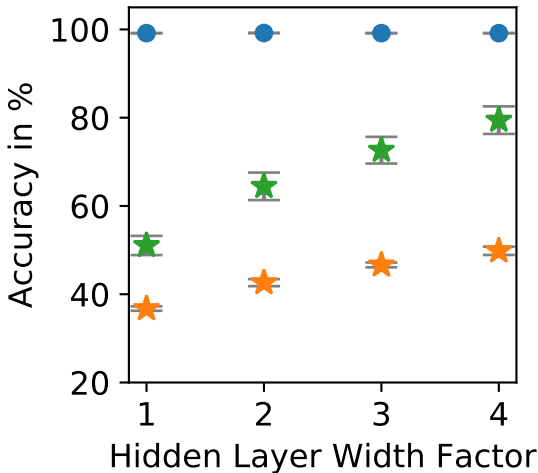

Supplement: supplementary_material [file attachment]

# Test

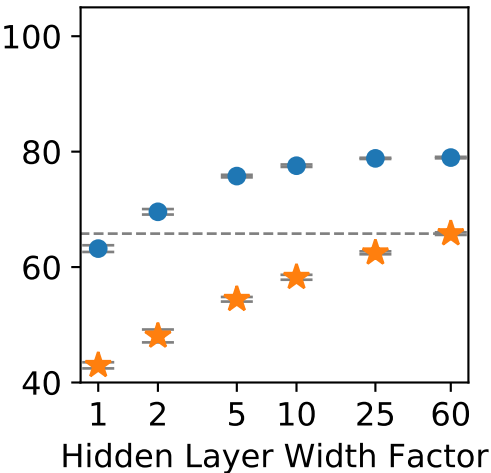

Supplement: supplementary_material [file attachment]

# LinLeNet with translations

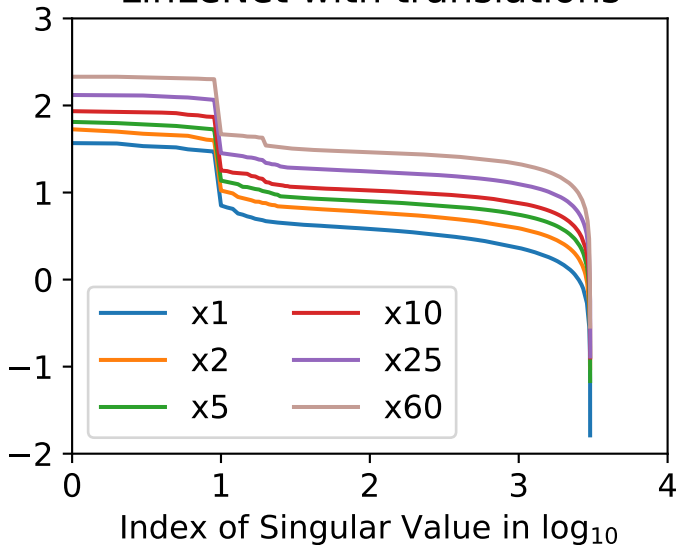

Supplement: supplementary_material [file attachment]

# Test

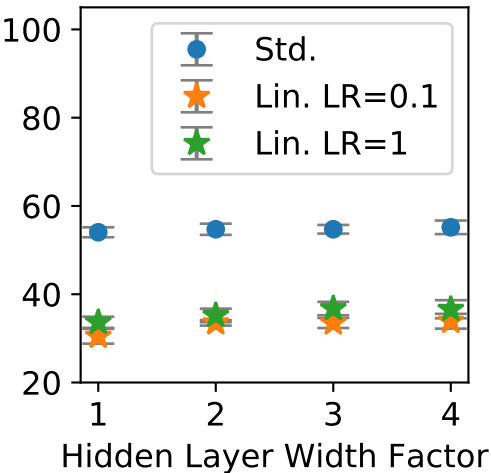

Supplement: supplementary_material [file attachment]

# LinLeNet

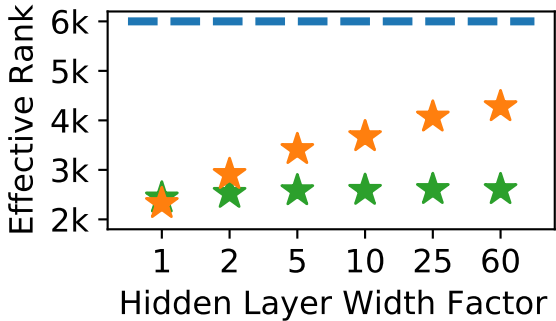

Supplement: supplementary_material [file attachment]

# LinLeNet

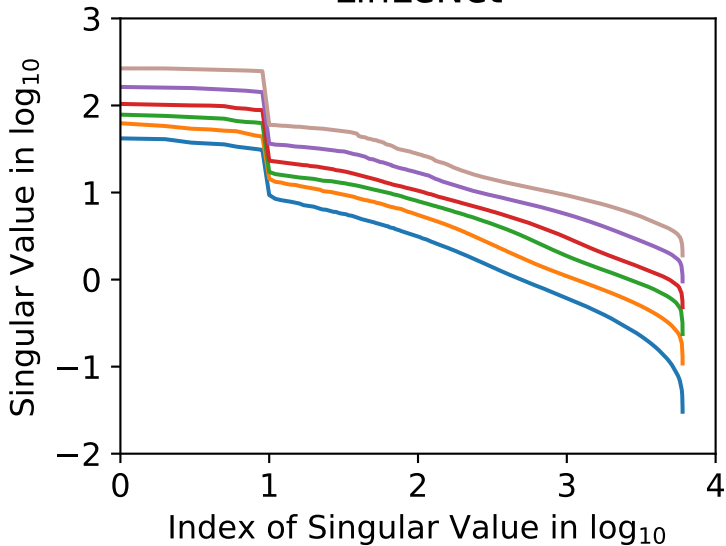

Supplement: supplementary_material [file attachment]

# LinAlexNet

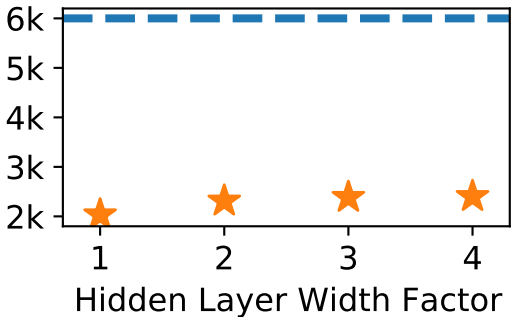

Supplement: supplementary_material [file attachment]

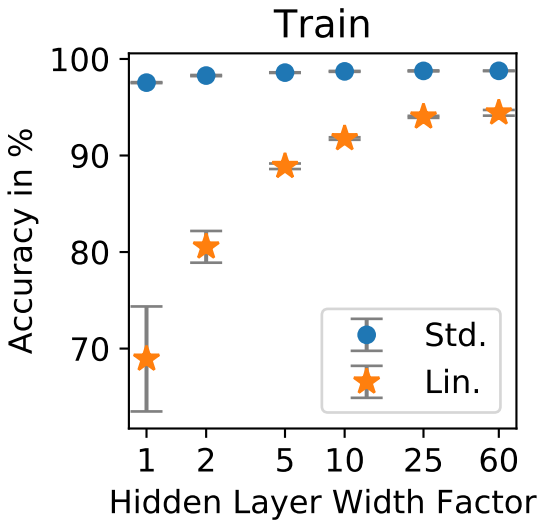

Supplement: supplementary_material [file attachment]

# Train

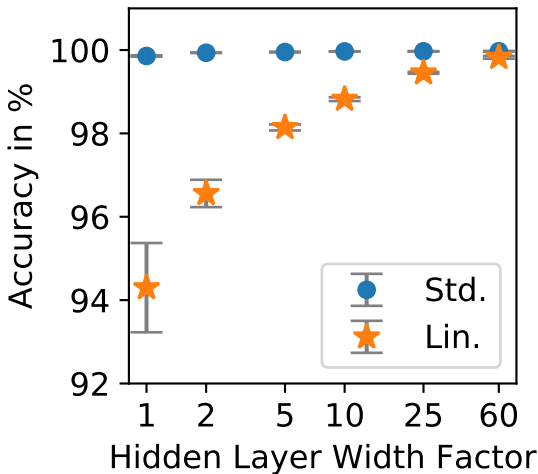

Supplement: supplementary_material [file attachment]

# Train

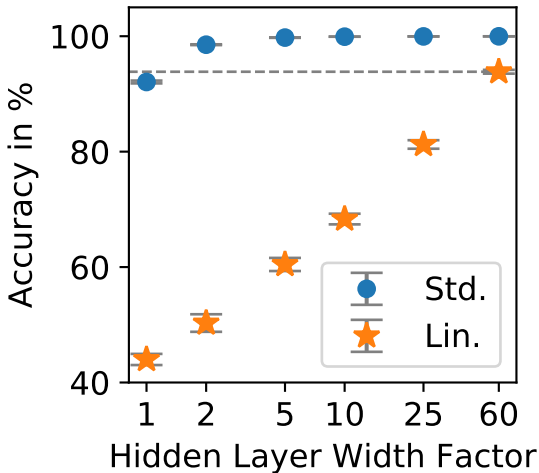

Supplement: supplementary_material [file attachment]

# LinAlexNet

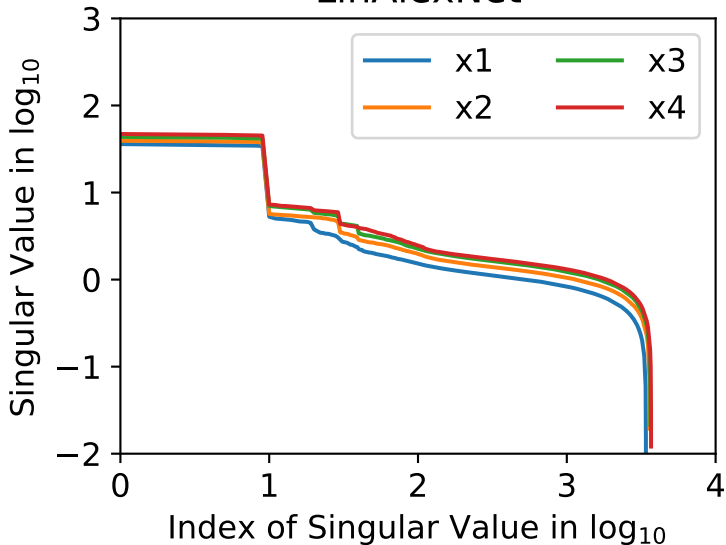

Supplement: supplementary_material [file attachment]

# Test

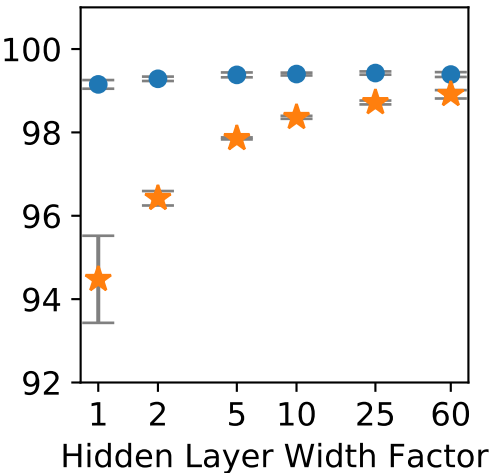

Supplement: supplementary_material [file attachment]

# Test

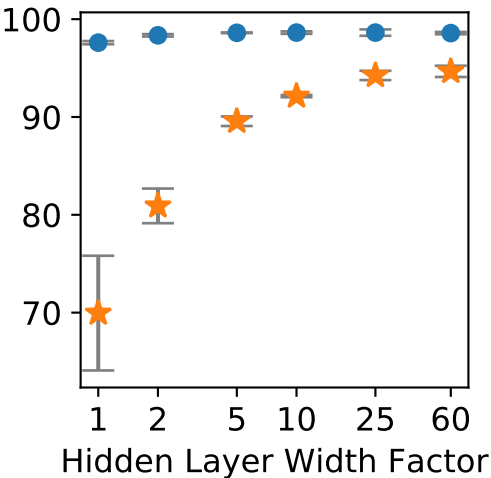

Supplement: supplementary_material [file attachment]
